# Supplementary material for: A mesoporous Au film with surface sulfur modification for efficient ammonia electrosynthesis
Source: Royal Society of Chemistry journal article supplement (doi:10.1039/d0ta07305a), 2020-01-01
Supplement: d0ta07305a1.pdf [file d0ta07305a1.pdf]

Electronic Supplementary Information for

**Mesoporous Au film with surface sulfur modification for efficient  
ammonia electrosynthesis**

Mei Zhang, Ziqiang Wang,\* Hongjie Yu, Shengqi Wang, You Xu, Xiaonian Li,

Liang Wang\* and Hongjing Wang\*

State Key Laboratory Breeding Base of Green-Chemical Synthesis Technology, College of  
Chemical Engineering, Zhejiang University of Technology, Hangzhou 310014, P. R. China

\*Corresponding authors' E-mails: zqwang@zjut.edu.cn; wangliang@zjut.edu.cn; hjw@zjut.edu.cn

**Production determination.** Indophenol indicator method was adopted to estimate the concentration of ammonia in the Na<sub>2</sub>SO<sub>4</sub> electrolyte after electrolysis for 2 h.<sup>1,2</sup> Typically, 500  $\mu$ L of NaOH solution (0.32 M) containing sodium salicylate (0.4 M), 50  $\mu$ L of NaClO solution (0.05 M) containing NaOH (0.75 M), and 50  $\mu$ L of C<sub>5</sub>FeN<sub>6</sub>Na<sub>2</sub>O (1 wt%) dissolved to 10 mL of deionized water were added into 4 mL of electrolyte in the dark for 1 h. Then, absorbance was determined by an ultraviolet-visible (UV-vis) spectrophotometer (Shimadzu UV-2450) using indophenol blue method at  $\lambda = 685$  nm. The absolute calibration curve was obtained using the standard NH<sub>4</sub>Cl solution with a series of NH<sub>4</sub><sup>+</sup> concentrations. All the measurements were conducted at least for 3 times for checking the reproducibility, and the data deviation was within 0.2%. The NH<sub>3</sub> yield ( $r_{\text{NH}_3}$ ) and Faradaic efficiency (FE) were calculated by using the following equations:

$$r_{\text{NH}_3} = (c_{\text{NH}_3} \times V)/t \times m \quad (1)$$

$$\text{FE} = 3F \times n_{\text{NH}_3} / Q \quad (2)$$

where  $c_{\text{NH}_3}$  ( $\mu\text{g mL}^{-1}$ ) is the mass concentration of produced NH<sub>3</sub>,  $V$  (mL) is the volume of the Na<sub>2</sub>SO<sub>4</sub> electrolyte,  $t$  (h) is the reduction reaction time,  $m$  (mg) is the loading mass of catalysts,  $F$  (96485 C mol<sup>-1</sup>) is the faraday constant,  $n_{\text{NH}_3}$  (mol) is the mole of produced NH<sub>3</sub> and  $Q$  (C) is the total electric quantity in the whole NRR process.

The concentration of hydrazine was spectrophotometrically determined by using Watt-Chrisp spectrophotometric method.<sup>3</sup> A mixed solution containing 5.99 g of 4-dimethylaminobenzaldehyde (C<sub>9</sub>H<sub>11</sub>NO), 30 mL of HCl and 300 mL of ethanol was used as the color reagent. Specifically, 5 mL of electrolyte was mixed with 5 mL of color reagent at room temperature. After standing for 10 min, the absorbance of the resulting solution was measured at a wavelength of 458 nm. The

concentration-absorbance curve was calibrated by using the standard  $\text{N}_2\text{H}_4$  solution under various concentrations ranging from 0.2 to 2.0  $\text{mg mL}^{-1}$ . All the measurements were taken at least for three times in order to check the reproducibility, and the data deviation was within 0.3%.

**Detection of  $\text{NO}_3^-$  ions:** The  $\text{NO}_3^-$  ions were detected according to the reported literature.<sup>4</sup> The standard solutions of  $\text{NO}_3^-$  ions were prepared as follows.

- 1) 100  $\mu\text{g mL}^{-1}$  stock: 0.1 g of pre-dried  $\text{KNO}_3$  was added into 1 L of deionized water.
- 2) 5  $\mu\text{g mL}^{-1}$  stock: 5 mL of the above 100  $\mu\text{g mL}^{-1}$  stock was mixed with deionized water to 100 mL.
- 3) The 0.1, 0.2, 0.5, 1.0, 1.5, 2.0, 2.5, 3.0, 4.0 and 5.0 mL solutions were separately added into the test tubes, which was mixed with deionized water to 5 mL, and 0.1, 0.2, 0.5, 1.0, 1.5, 2.0, 2.5, 3.0, 4.0 and 5.0  $\mu\text{g mL}^{-1}$  standard solutions were finally obtained.

The concentration of the  $\text{NO}_3^-$  in  $\text{Na}_2\text{SO}_4$  solution can be determined by UV-vis spectrophotometer at the wavelength of 220 nm. In a typical procedure, 5 mL of electrolytes were added to the test tubes followed by addition of 0.1 mL of 1.0 M HCl. After shaking up and standing for 5 min, the concentration of  $\text{NO}_3^-$  was measured using UV-vis spectrophotometer. The standard curve for  $\text{NO}_3^-$  ions was plotted using the standard solutions.

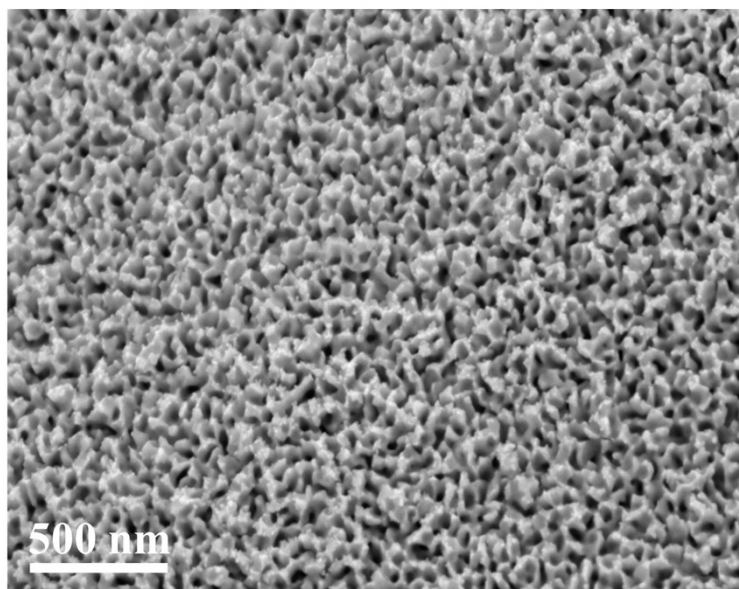

**Fig. S1** The SEM image of mAu film/NF.

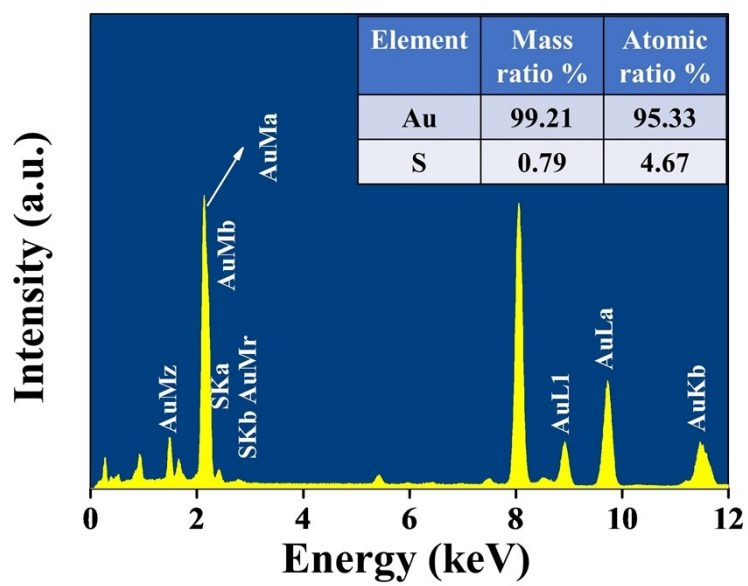

**Fig. S2** The EDX spectrum of S-mAu film.

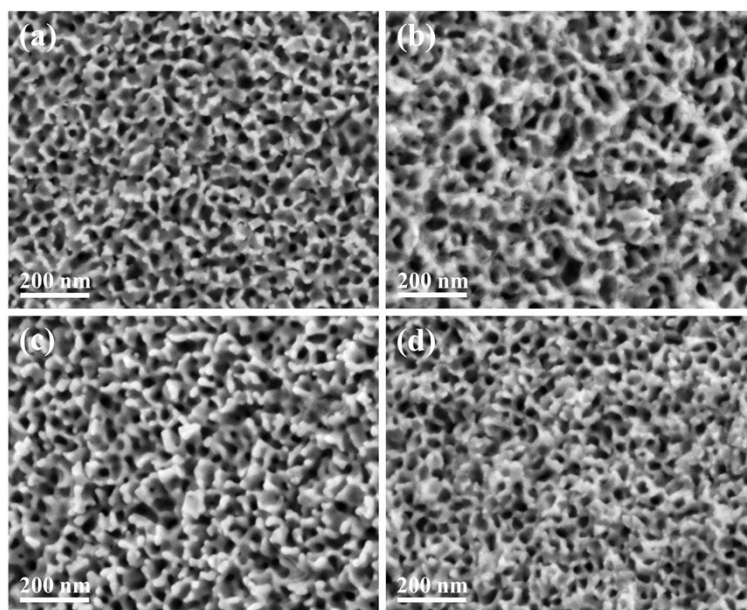

**Fig. S3** SEM images of the S-mAu film/NF with different S doping amounts: (a) 0 mg, (b) 10 mg, (c) 20 mg (d) 40 mg of sulfur.

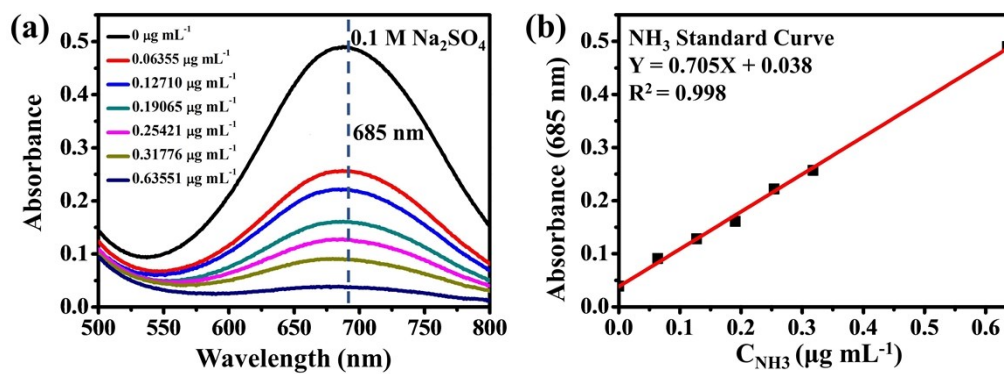

**Fig. S4** (a) UV-Vis absorption spectra of standard  $\text{NH}_3$  solutions with color development and (b) the corresponding calibration curve. The fitting curves shows good linear relation of absorbance with  $\text{NH}_3$  concentration ( $Y = 0.705X + 0.038$ ,  $R^2 = 0.998$ ) of three times independent calibration curves.

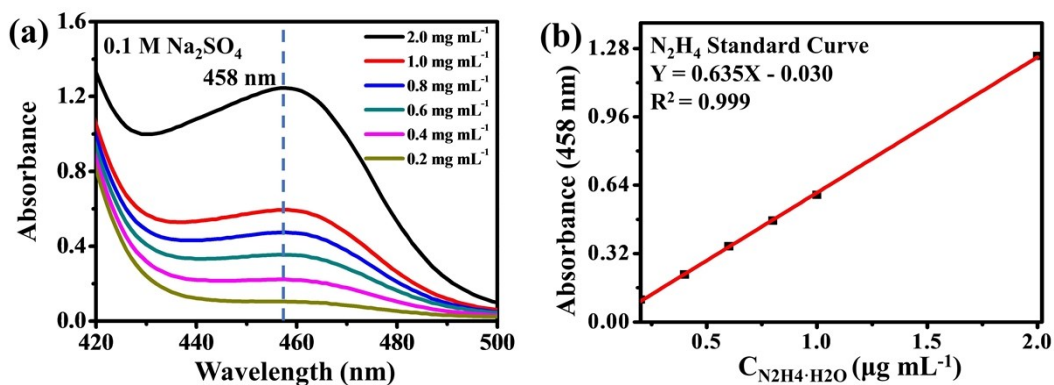

**Fig. S5** (a) UV-Vis absorption spectra of standard  $\text{N}_2\text{H}_4$  solutions with color development and (b) calibration curve used for estimation of  $\text{N}_2\text{H}_4$  concentration. The fitting curve shows good linear relation of absorbance with  $\text{N}_2\text{H}_4$  concentration ( $Y = 0.635X - 0.030$ ,  $R^2 = 0.999$ ) of three times independent calibration curves.

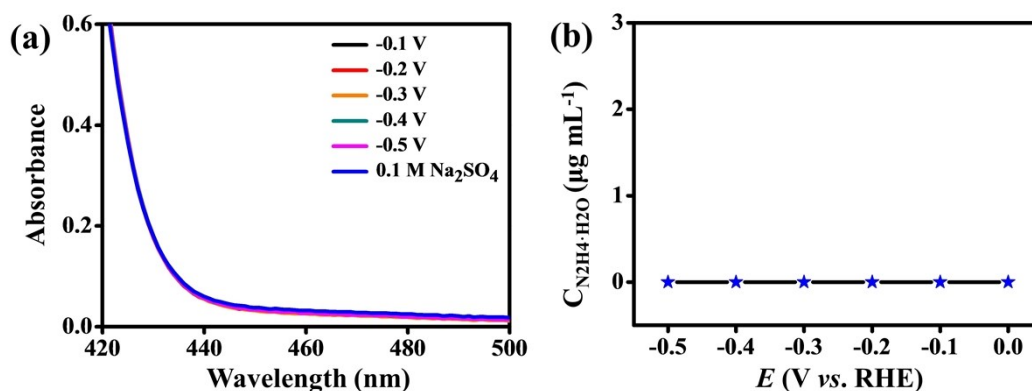

**Fig. S6** (a) The UV-vis absorption spectra and (b) corresponding yields of  $\text{N}_2\text{H}_4$  at selected potentials.

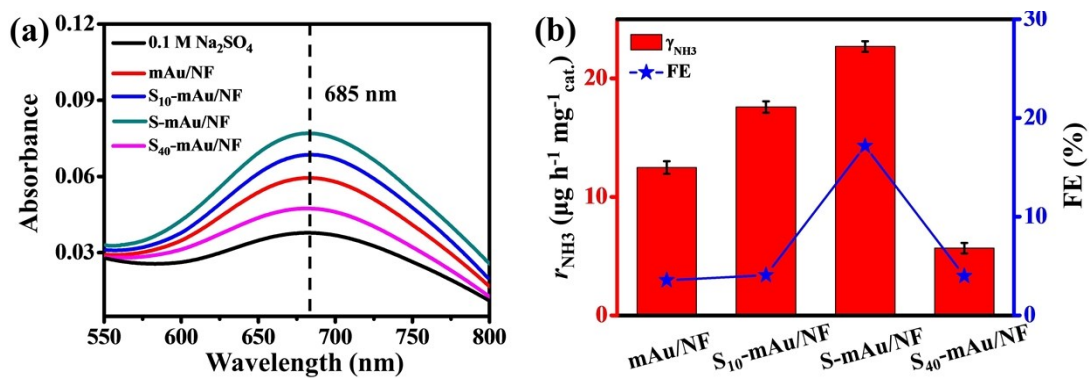

**Fig. S7** (a) UV-vis absorption spectra of different catalysts at -0.2 V for 2-h electrolysis under ambient conditions, and (b) the  $\text{NH}_3$  yields and Faraday efficiencies at selected potentials.

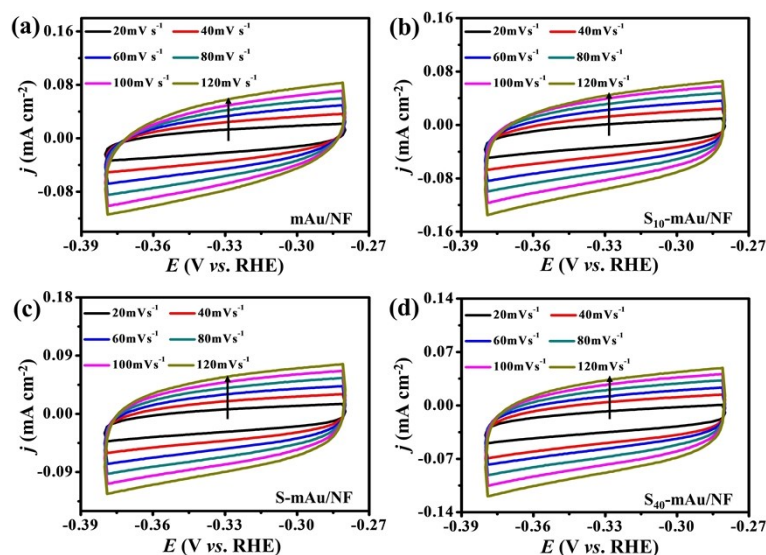

**Fig. S8** Cyclic voltammograms for different catalysts in 0.1 M  $\text{Na}_2\text{SO}_4$  solution with potential ranges from -0.35 to -0.45 V.

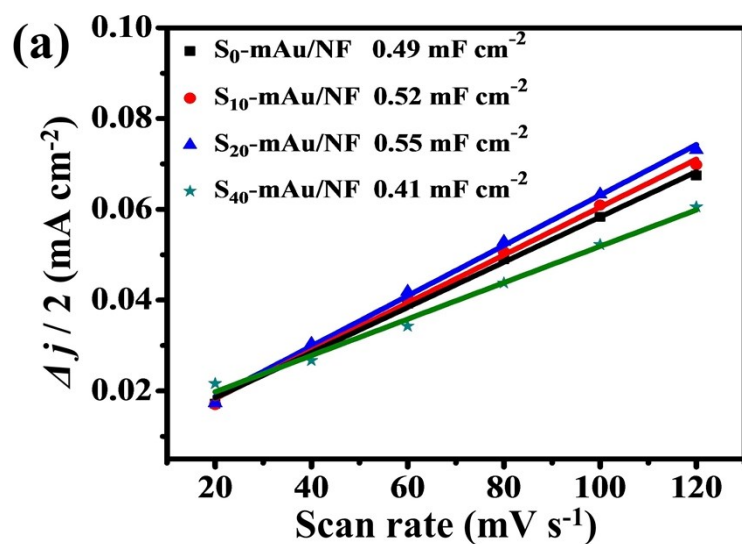

Fig. S9 (a) Charging current density differences plotted against scan rates.

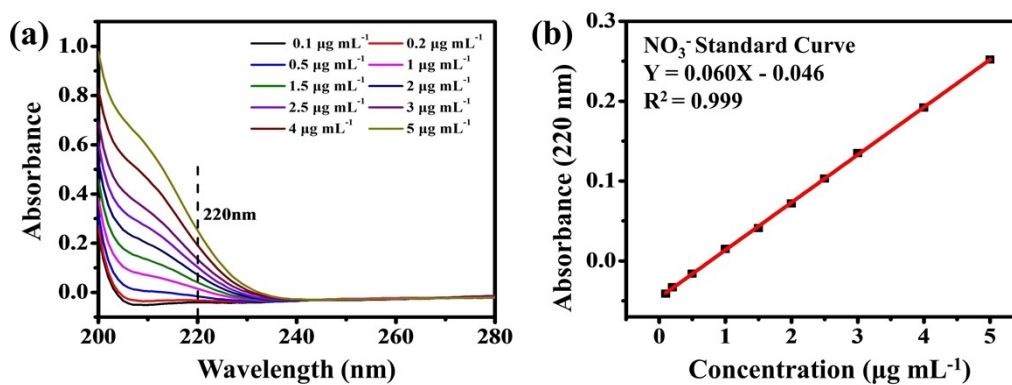

Fig. S10. (a) UV-vis spectra for various concentrations of KNO<sub>3</sub> solutions. (b) Calibration curve used for calculating the concentration of nitrate.



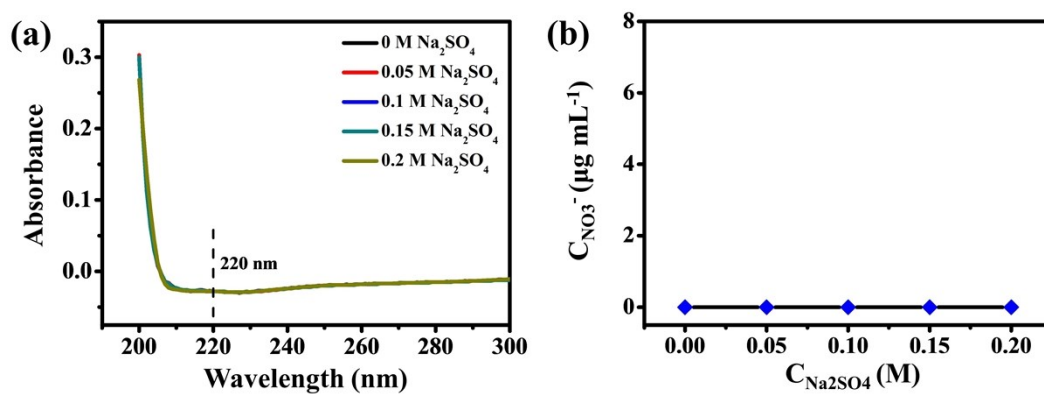

**Fig. S11.** (a) UV-vis adsorption spectra for determining the concentration of  $\text{NO}_3^-$  ions in  $\text{Na}_2\text{SO}_4$ .

(b) The concentration of  $\text{NO}_3^-$  ions in various concentrations of  $\text{Na}_2\text{SO}_4$ .

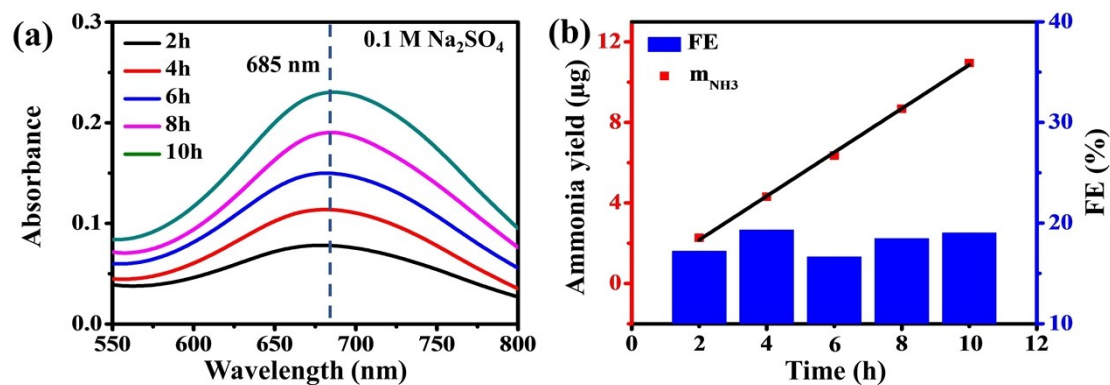

**Fig. S12** (a) UV-vis absorption spectra of solution with different electrolysis times at  $-0.2$  V and (b) the linear relationship between the  $m_{\text{NH}_3}$  and the electrolysis time.

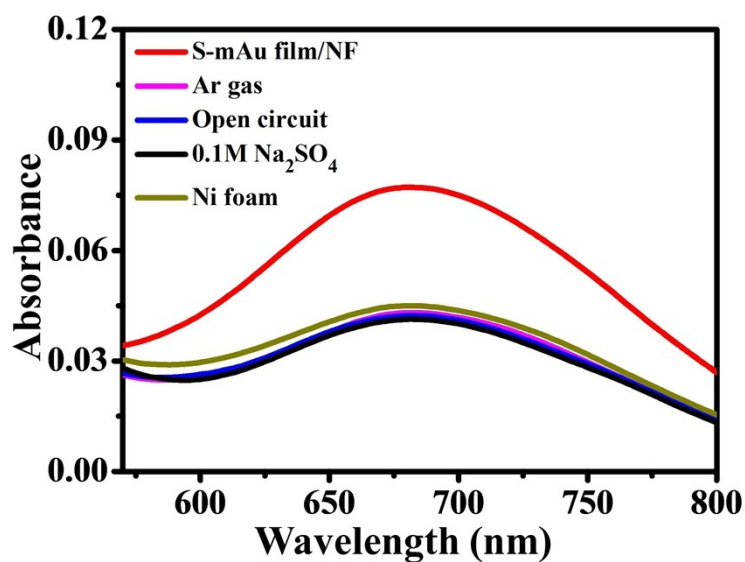

**Fig. S13** The absorbance of the electrolytes at -0.2 V for 2 h under different reaction conditions.

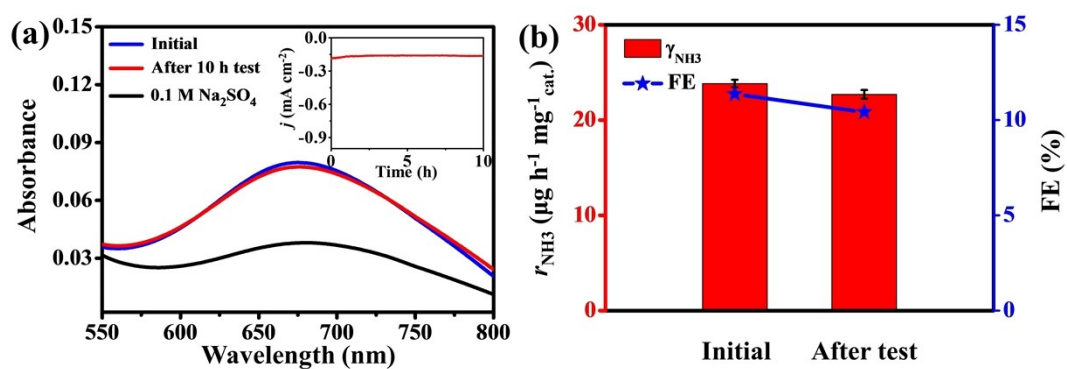

**Fig. S14** (a) The comparison of UV-vis absorption spectra of the electrolytes before and after electrolysis for 10 h, and the inset shows the time-dependent measurements. (b) Corresponding the  $\text{NH}_3$  yields and Faraday efficiencies of the S-mAu film/NF.

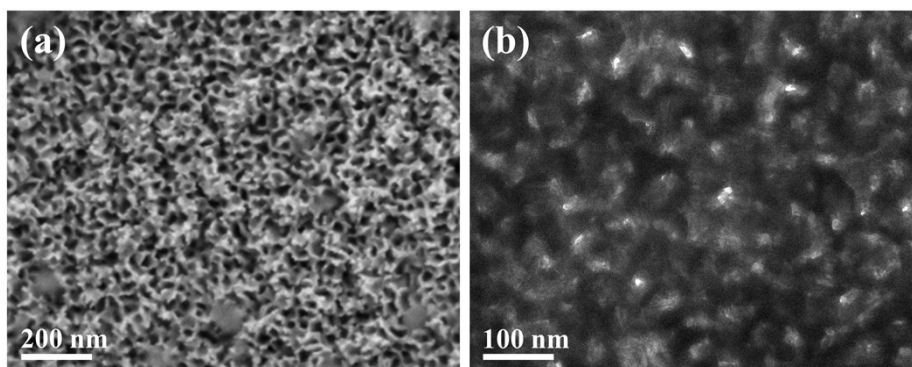

**Fig. S15** The SEM (a) and TEM images (b) of the S-mAu film/NF after durability measurement.

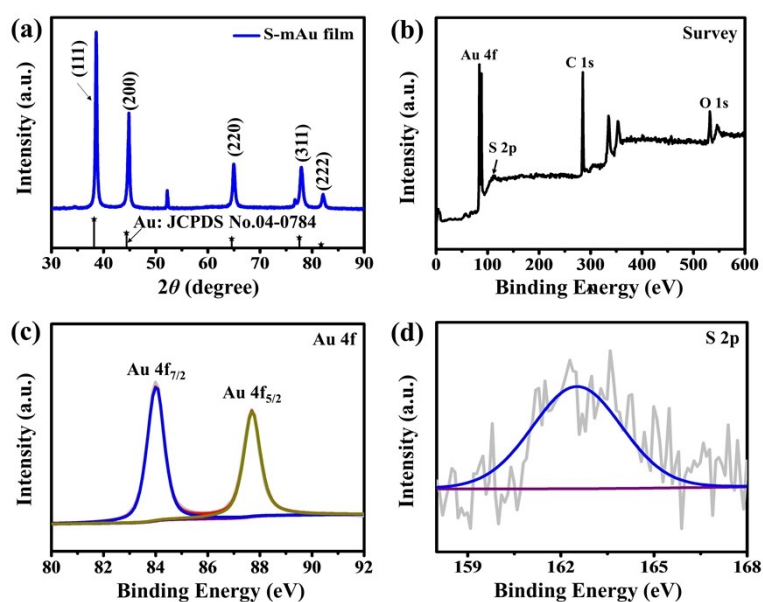

**Fig. S16** (a) Wide-angle XRD patterns and (b) the XPS survey spectrum and high-resolution XPS spectra of (c) the Au 4f and (d) S 2p core levels for S-mAu film after durability measurement.

**Table S1** Summary of the representative reports on electrocatalytic NRR at ambient conditions.

| Catalyst                              | Electrolyte                               | $r_{\text{NH}_3}$                                                       | FE(%)       | Ref.             |
|---------------------------------------|-------------------------------------------|-------------------------------------------------------------------------|-------------|------------------|
| <b>S-mAu film/NF</b>                  | <b>0.1 M Na<sub>2</sub>SO<sub>4</sub></b> | <b>22.7 <math>\mu\text{g h}^{-1} \text{mg}^{-1}_{\text{cat}}</math></b> | <b>17.2</b> | <b>This work</b> |
|                                       |                                           | <b>(4.54 <math>\mu\text{g h}^{-1} \text{cm}^{-2}</math>)</b>            |             |                  |
| PdCuIr-LS                             | 0.1 M Na <sub>2</sub> SO <sub>4</sub>     | 13.43 $\mu\text{g h}^{-1} \text{mg}^{-1}_{\text{cat}}$                  | 1.84        | [5]              |
| pAu/NF                                | 0.1 M Na <sub>2</sub> SO <sub>4</sub>     | 9.42 $\mu\text{g h}^{-1} \text{cm}^{-2}$                                | 13.36       | [6]              |
| Au flowers                            | 0.1 M HCl                                 | 25.57 $\mu\text{g h}^{-1} \text{mg}_{\text{cat}}^{-1}$                  | 6.05        | [7]              |
| Au@SnO <sub>2</sub>                   | 0.1 M HCl                                 | 21.9 $\mu\text{g h}^{-1} \text{mg}_{\text{cat}}^{-1}$                   | 15.2        | [8]              |
| Au/TiO <sub>2</sub>                   | 0.1 M HCl                                 | 21.4 $\mu\text{g h}^{-1} \text{mg}_{\text{cat}}^{-1}$                   | 8.11        | [9]              |
| <i>a</i> -Au/CeO <sub>x</sub> -RGO    | 0.1 M HCl                                 | 8.3 $\mu\text{g h}^{-1} \text{mg}^{-1}_{\text{cat}}$                    | 10.10       | [10]             |
| Au/WO <sub>3-x</sub>                  | 0.1 M KOH                                 | 23.15 $\mu\text{g h}^{-1} \text{mg}_{\text{cat}}^{-1}$                  | 14.72       | [11]             |
| Au-Fe <sub>3</sub> O <sub>4</sub> NPs | 0.1 M KOH                                 | 21.42 $\mu\text{g h}^{-1} \text{cm}^{-2}$                               | 10.54       | [12]             |
| Au/C                                  | 0.1 M KOH                                 | 17.49 $\mu\text{g h}^{-1} \text{mg}_{\text{Au}}^{-1}$                   | 5.79        | [13]             |
| Ru@MXene                              | 0.1 M KOH                                 | 2.3 $\mu\text{mol h}^{-1} \text{cm}^{-2}$                               | 13.13       | [14]             |
| Au NRs                                | 0.1 M KOH                                 | 1.65 $\mu\text{g h}^{-1} \text{cm}^{-2}$                                | 3.88        | [15]             |
| Hollow gold nanocage                  | 0.5 M LiClO <sub>4</sub>                  | 3.9 $\mu\text{g cm}^{-2} \text{h}^{-1}$                                 | 14.8        | [16]             |

## References

1. C. Patton and S. Crouch, *Anal. Chem.*, 1977, **49**, 464-469.
2. D. Zhu, L. Zhang, R. Ruther and R. Hamers, *Nat. Mater.*, 2013, **12**, 836-841.
3. A. Ensafi, M. Sadeghie and F. Emaei, *J. Anal. Chem.*, 1999, **54**, 1024-1027.
4. Li, L.; Tang, C.; Yao, D.; Zheng, Y.; Qiao, S.-Z. Electrochemical Nitrogen Reduction: Identification and Elimination of Contamination in Electrolyte. *ACS Energy Letters* 2019, **4** (9), 2111-2116, DOI: 10.1021/acseenergylett.9b01573.
5. R. Kumar, Z. Wang, C. Li, A. Kumar, H. Xue, Y. Xu, X. Li, L. Wang and H. Wang, *J. Mater. Chem. A*, 2019, **7**, 3190-3196.
6. H. Wang, H. Yu, Z. Wang, Y. Li, Y. Xu, X. Li, H. Xue and L. Wang, *Small*, 2019, **15**, 1804769.
7. Z. Wang, Y. Li, H. Yu, Y. Xu, H. Xue, X. Li, H. Wang and L. Wang, *ChemSusChem*, 2018, **11**, 3480-3485.
8. P. Wang, Y. Ji, Q. Shao, Y. Li and X. Huang, *Sci. Bull.*, 2020, **65**, 350-358.
9. M. Shi, D. Bao, B. Wulan, Y. Li, Y. Zhang, J. Yan and Q. Jiang, *Adv. Mater.*, 2017, **29**, 1606550.
10. S. Li, D. Bao, M. Shi, B. Wulan, J. Yan and Q. Jiang, *Adv. Mater.*, 2017, **29**, 1700001.
11. Y. Li, P. Yan, J. Chen, Y. Ren, Y. Zhou, T. Ge and Q. Xu, *Chem. Commun.*, 2019, **55**, 13307-13310.
12. J. Zhang, Y. Ji, P. Wang, Q. Shao, Y. Li and X. Huang, *Adv. Funct. Mater.*, 2020, **30**, 1906579.
13. C. Chen, C. Liang, J. Xu, J. Wei, X. Li, Y. Zheng, J. Li, H. Tang and J. Li, *Electrochim. Acta*, 2020, **335**, 135708.
14. A. Liu, M. Gao, X. Ren, F. Meng, Y. Yang, Q. Yang, W. Guan, L. Gao, X. Liang and T. Ma, *Nanoscale*, 2020, **12**, 10933-10938.
15. D. Bao, Q. Zhang, F. Meng, H. Zhong, M. Shi, Y. Zhang, J. Yan, Q. Jiang and X. Zhang,

*Adv. Mater.*, 2017, **29**, 1604799.

16. M. Nazemi, S. Panikkanvalappil and M. El-Sayed, *Nano Energy*, 2018, **49**, 316-323.
